# Supplementary material for: LLGL2 Inhibits Ovarian Cancer Metastasis by Regulating Cytoskeleton Remodeling via ACTN1
Source: MDPI journal article supplement (doi:10.3390/cancers15245880), 2023-12-18

Full unedited gel for Figure 3A

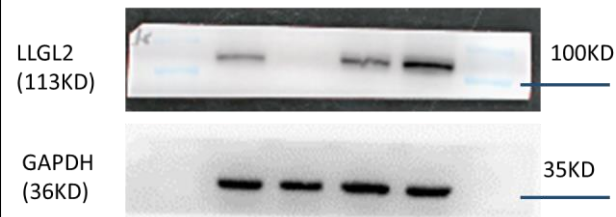

Full unedited gel for Figure 3C  
SKOV3

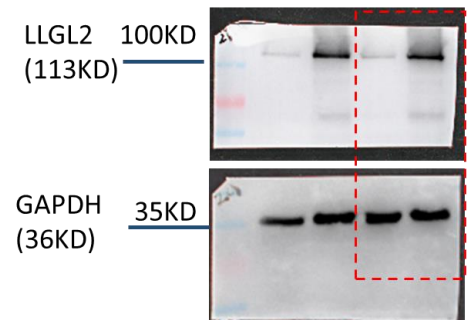

Full unedited gel for Figure 3B

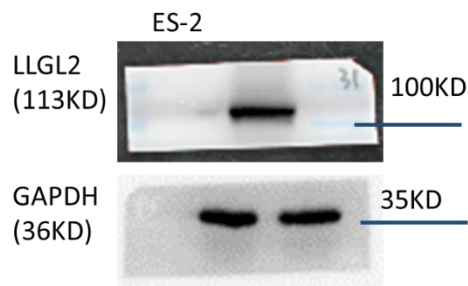

Full unedited gel for Figure 3D

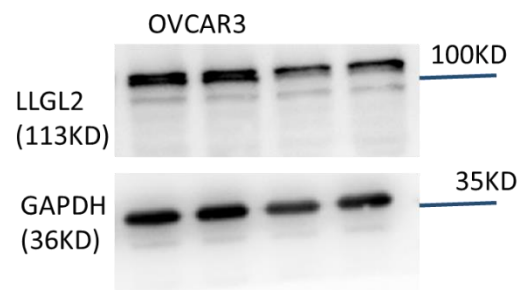

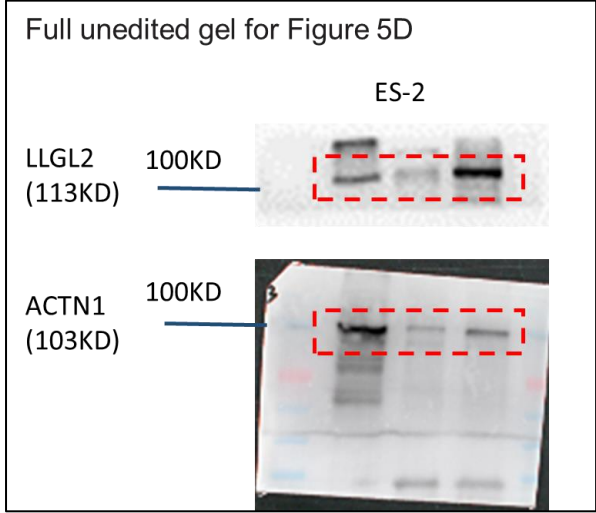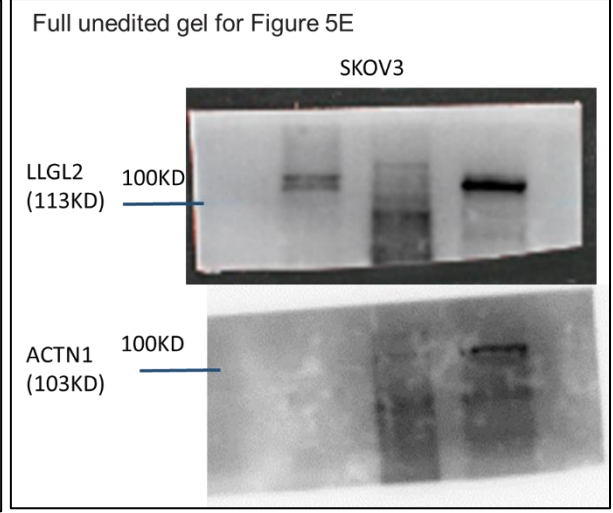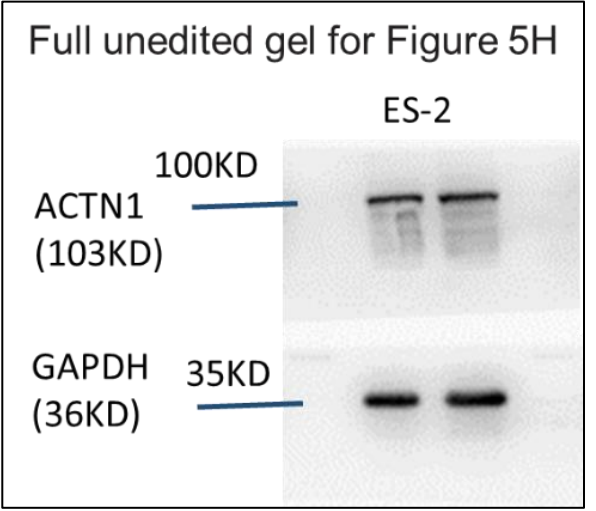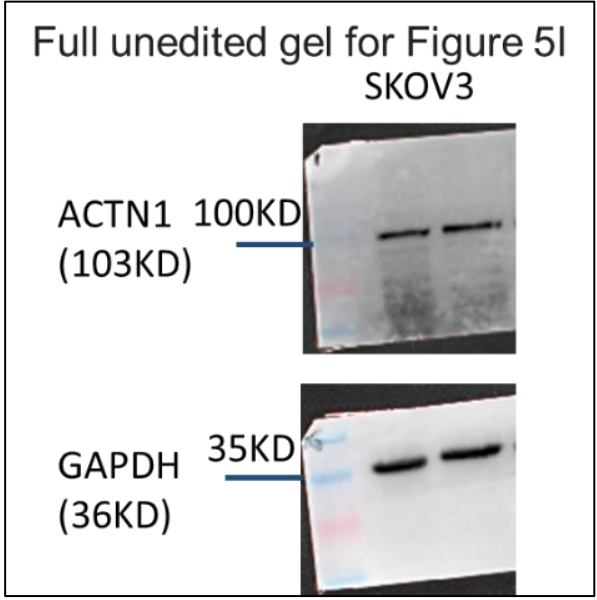

Supplement: s1 [file s1]
