# Supplementary material for: LLGL2 Inhibits Ovarian Cancer Metastasis by Regulating Cytoskeleton Remodeling via ACTN1
Source: MDPI journal article supplement (doi:10.3390/cancers15245880), 2023-12-18
Supplement: s1 [file s1]

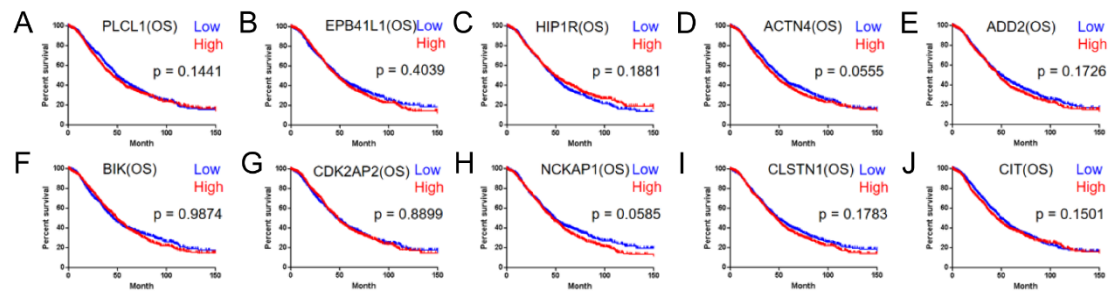

Figure S1 Overall survival (OS) curves of *PLCL1*, *EPB41L1*, *HIP1R*, *ADD2*, *ACTN4*, *CDK2AP2*, *NCKAP1*, *CLSTN1* and *CIT* in ovarian cancer patients (CSIOVDB).

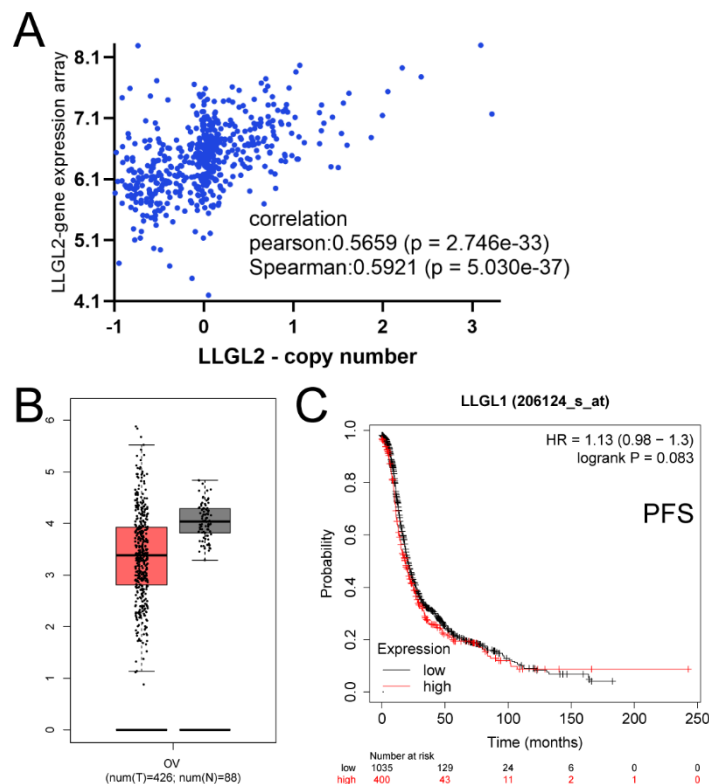

Figure S2. *LLGL1* had no consistently significant differences from *LLGL2*. (A) Correlation between copy number variation of *LLGL2* and mRNA expression in OV (data from UCSC Xena). (B) *LLGL1* expression in tumor and normal tissues in OV from TCGA. (C) Kaplan–Meier plot of survival of *LLGL1* in patients with ovarian cancer.

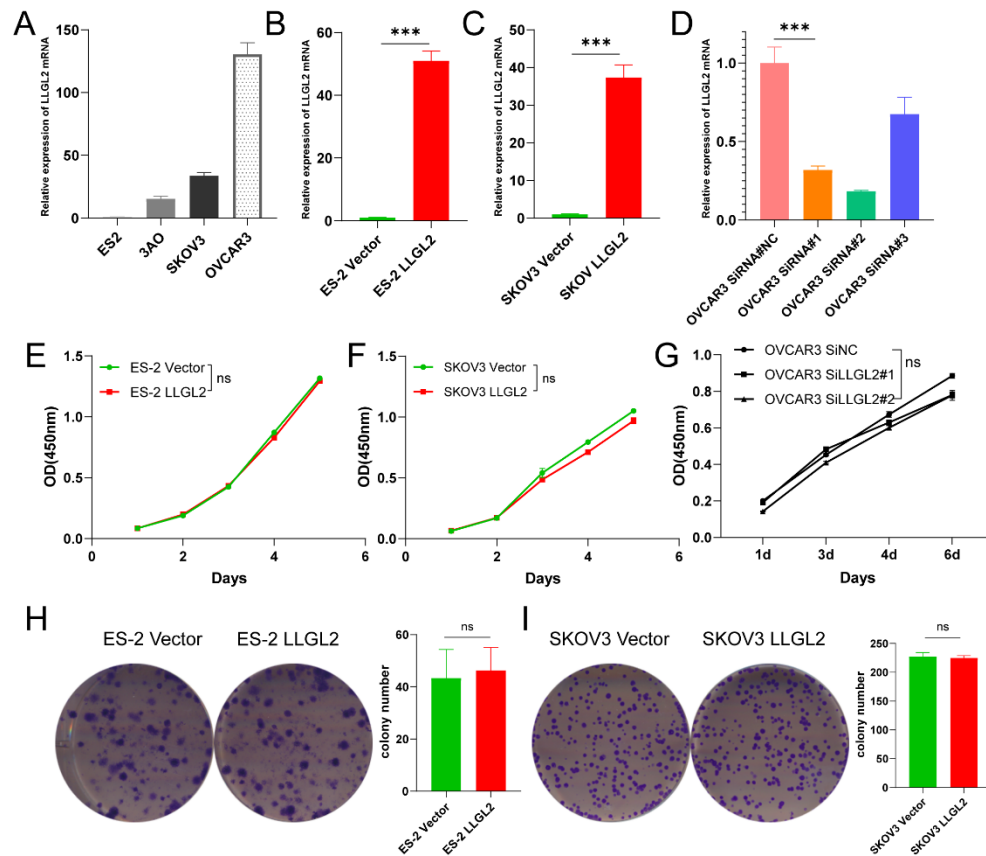

Figure S3. *LLGL2* did not affect cell proliferation. (A) The relative mRNA expression levels of *LLGL2* in ovarian cancer cell lines. (B) The efficiency of *LLGL2* overexpression in OCCC cells ES-2 by lentiviral was tested by qPCR. (C) The efficiency of *LLGL2* overexpression in SOC cells SKOV3 by lentiviral was tested by qPCR. (D) The efficiency of *LLGL2* silencing in SOC cells OVCAR3 by small interfering RNA was tested by qPCR. (E-F) Proliferation curve of control (Vector) and *LLGL2*-overexpressing ES-2 cells and SKOV3 cells. (G) Proliferation curve of control (NC) and *LLGL2*- knockdown OVCAR3 cells. (H-I) Colony formation of control (Vector) and *LLGL2*-overexpressing ES-2 cells and SKOV3 cells.

\* $P < 0.05$ , \*\* $P < 0.01$ , \*\*\* $P < 0.001$

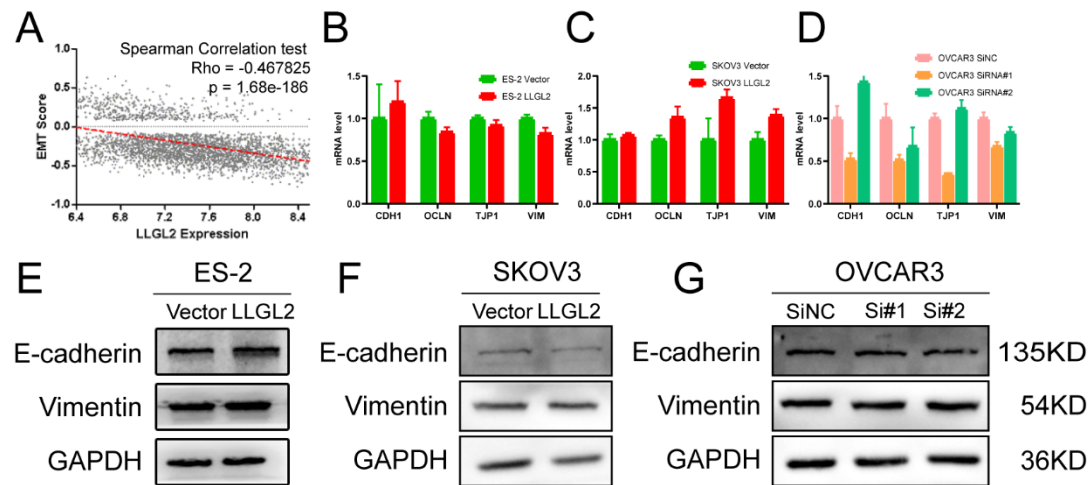

Figure S4 *LLGL2* inhibited ovarian cancer cell metastasis independently of EMT. (A) *LLGL2* was negatively correlated with the EMT score from CSIOVDB. (B-G) EMT marker expression in indicated cells was detected by qPCR (B-D) and Western blot (E-G).

# Supplemental Tables

Table S1. Clinical characteristics of the two groups in GSE65986.

| P: | ID         | age | histology | pfs | prognosis | event | Stage | stage    | group |
|----|------------|-----|-----------|-----|-----------|-------|-------|----------|-------|
|    | GSM1612098 | 57  | Clear     | 57  | NED       | 0     | 1c    | early    | good  |
|    | GSM1612099 | 59  | Clear     | 52  | NED       | 0     | 1a    | early    | good  |
|    | GSM1612103 | 67  | Clear     | 49  | NED       | 0     | 1a    | early    | good  |
|    | GSM1612104 | 37  | Clear     | 48  | NED       | 0     | 1c    | early    | good  |
|    | GSM1612119 | 74  | Clear     | 11  | AWD       | 1     | 3c    | advanced | bad   |
|    | GSM1612117 | 55  | Clear     | 6   | DOD       | 1     | 1c    | early    | bad   |
|    | GSM1612116 | 80  | Clear     | 5   | AWD       | 1     | 4     | advanced | bad   |
|    | GSM1612118 | 64  | Clear     | 2   | DOD       | 1     | 3c    | advanced | bad   |

Table S2. List of genes enriched in GO: 0030036 and GO: 0030866

| Gene    | Description                                     | Expression      |
|---------|-------------------------------------------------|-----------------|
| ADD2    | adducin 2                                       | Up-regulation   |
| ACTN4   | actinin alpha 4                                 | Up-regulation   |
| HIP1R   | huntingtin interacting protein 1 related        | Down-regulation |
| EPB41L1 | erythrocyte membrane protein band 4.1 like 1    | Up-regulation   |
| CLSTN1  | calsyntenin 1                                   | Up-regulation   |
| PLCL1   | phospholipase C like 1 (inactive)               | Down-regulation |
| BIK     | BCL2 interacting killer                         | Up-regulation   |
| LLGL2   | LLGL scribble cell polarity complex component 2 | Up-regulation   |
| CIT     | citron rho-interacting serine/threonine kinase  | Up-regulation   |
| NCKAP1  | NCK associated protein 1                        | Up-regulation   |
| CDK2AP2 | cyclin dependent kinase 2 associated protein 2  | Up-regulation   |
